# Supplementary material
Source: MDPI journal article supplement (https://www.mdpi.com/2073-4352/13/4/567)
Supplement: s1 [file s1]

## **Supplementary Data**

### **Characterization, Kinetic Using Deconvolution Techniques and Thermodynamic Studied of Synthetic $\text{MgHPO}_4 \cdot 3\text{H}_2\text{O}$**

Saifon Kullyakool<sup>a,b</sup>, Somphob Thompho<sup>c</sup>, Kittichai Chaiseeda<sup>d,\*</sup>, Banjong Boonchom<sup>a,b,\*\*</sup>

<sup>a</sup> Advanced Functional Phosphate Material Research Unit, Department of Chemistry, Faculty of Science, King Mongkut's Institute of Technology Ladkrabang, Bangkok 10520, Thailand

<sup>b</sup> Municipal Waste and Wastewater Management Learning Center, Faculty of Science, King Mongkut's Institute of Technology Ladkrabang, Bangkok 10520, Thailand

<sup>c</sup> Pharmaceutical Research Instrument Center, Faculty of Pharmaceutical Sciences, Chulalongkorn University, Pathumwan, Bangkok 10330, Thailand

<sup>d</sup> Organic Synthesis, Electrochemistry and Natural Product Research Unit (OSEN), Department of Chemistry, Faculty of Science, King Mongkut's University of Technology Thonburi, Bangkok 10140, Thailand

\* Corresponding author.

\*\* Corresponding author.

*E-mail address:* kittichai@gmail.com (K. Chaiseeda), kbbanjon@gmail.com or banjon.bo@kmitl.ac.th (B. Boonchom)

Tel +66- 2329-8400 ext. 8411

Fax: +66-2329-8412

### Kinetic model assumptions

The models are classified based on the mathematic assumptions about the including nucleation, geometric shape, diffusion, and reaction order. The details will be described as follow.

#### 1) Nucleation and growth

Energy fluctuation of crystal due to imperfection (i.e. impurities, surface, edges, dislocations, cracks, and point defection) may overcome the barriers and lead to a new product. There are three assumptions that used to describe the nucleation rates such as instantaneous nucleation, single-step nucleation (expressing the exponential and linear laws), and multi-step nucleation (giving power law). For a single-step nucleation, assumed that the nucleation and nuclei growth occur in a single step. The rate ( $dN/dt$ ) equation of the nuclei forming at time  $t$  ( $N$ ), as a simple first-order process is expressed by following Eq. (S1)

$$\frac{dN}{dt} = k_N(N_0 - N) \quad (S1)$$

where  $N_0$  is the probable nuclei forming site and  $k_N$  is the nucleation rate constant. Integration of Eq. (S1) gives

$$N = N_0(1 - e^{-k_N t}) \quad (S2)$$

Differentiating Eq. (S2) yields the exponential law Eq. (S3).

$$\frac{dN}{dt} = k_N N_0 e^{-k_N t} \quad (S3)$$

From Eq. (S3), when  $k_N$  is small, the equation can be written as Eq. (S4) representing the linear law.

$$\frac{dN}{dt} = k_N N_0 \quad (S4)$$

When  $k_N$  is very large, Eq. (S4) become instantaneous law (Eq. (S5)).

$$\frac{dN}{dt} = \infty \quad (S5)$$

According to Bagdassarian's expression, the nucleation rate of multi-step are power law (Eq. (S6)).

$$N = \frac{N_0(k_i t)^\beta}{\beta!} = D t^\beta \quad (S6)$$

where,  $D = N_0(k_i)^\beta/\beta!$ . Differentiation of Eq. (S6) gives the equation

$$\frac{dN}{dt} = D\beta t^{\beta-1} \quad (S7)$$

Beside the nucleation rates based on several assumptions are shown in Table S1.

**Table S1** Mathematical expressions for nucleation rates law [1].

| Nucleation rate law | Differential form $dN/dT$ | Integral form         |
|---------------------|---------------------------|-----------------------|
| Exponential         | $k_N N_0 e^{-k_N t}$      | $N_0(1 - e^{-k_N t})$ |
| Linear              | $k_N N_0$                 | $k_N N_0 t$           |
| Instantaneous       | $\infty$                  | $N_0$                 |
| Power               | $D\beta t^{\beta-1}$      | $D t^\beta$           |

Nuclei growth rate ( $G(x)$ ) is expressed through the nuclei growth radius  $r(t, t_0)$  at time  $t$  and if  $t_0$  is the formation time, the rate of nuclei growth can be written as

$$r(t, t_0) = \int_{t_0}^t G(x) dx \quad (S8)$$

The nuclei growth radius are considered in terms of nucleus shape factor ( $\sigma$ ) and number of growth dimension ( $\lambda$ ), which these factors depend on volume occupied by individual nuclei  $v(t)$ . The volume occupied by a single nucleus can be written as the equation

$$v(t) = \sigma[r(t, t_0)]^\lambda \quad (S9)$$

The combination between the nucleation rate ( $dN/dt$ ) and the nuclei growth rate ( $v(t)$ ) leading to the total volume occupied by all nuclei,  $V(t)$  gives the equation as followed

$$V(t) = \int_0^t v(t) \left( \frac{dN}{dt} \right)_{t=t_0} dt_0 \quad (S10)$$

Substitutions of Eqs. (S8) and (S9) into Eq. (S10) yields

$$V(t) = \int_0^t \sigma \left( \int_{t_0}^t G(x) dx \right)^\lambda \left( \frac{dN}{dt} \right)_{t=t_0} dt_0 \quad (S11)$$

Under various assumptions of the nucleation rate law (such as in Table 2.3), therefore Eq. (S11) can be transformed to be numerous different mathematical mechanism functions as shown in Table S2.

**Table S2** Algebraic expressions of kinetic functions  $f(\alpha)$  and  $g(\alpha)$  and its corresponding mechanism [2].

| No.                                                                      | Mechanism  | Name of the kinetic function | $f(\alpha)$                               | $g(\alpha)$               | Rate-determining mechanism                                     |
|--------------------------------------------------------------------------|------------|------------------------------|-------------------------------------------|---------------------------|----------------------------------------------------------------|
| I. Chemical process or mechanism non-invoking equations                  |            |                              |                                           |                           |                                                                |
| 1.                                                                       | $F_{1/3}$  | One-third order              | $(3/2)(1-\alpha)^{1/3}$                   | $1-(1-\alpha)^{2/3}$      | Chemical reaction                                              |
| 2.                                                                       | $F_{3/4}$  | Three-quarters order         | $4(1-\alpha)^{3/4}$                       | $1-(1-\alpha)^{1/4}$      | Chemical reaction                                              |
| 3.                                                                       | $F_{3/2}$  | One and a half order         | $2(1-\alpha)^{3/2}$                       | $(1-\alpha)^{-1/2}-1$     | Chemical reaction                                              |
| 4.                                                                       | $F_2$      | Second order                 | $(1-\alpha)^2$                            | $(1-\alpha)^{-1}-1$       | Chemical reaction                                              |
| 5.                                                                       | $F_3$      | Third order                  | $(1/2)(1-\alpha)^3$                       | $(1-\alpha)^{-2}-1$       | Chemical reaction                                              |
| II. Acceleratory rate equations                                          |            |                              |                                           |                           |                                                                |
| 6.                                                                       | $P_{3/2}$  | Mampel power law             | $(2/3) \alpha^{-1/2}$                     | $\alpha^{3/2}$            | Nucleation                                                     |
| 7.                                                                       | $P_{1/2}$  | Mampel power law             | $2\alpha^{1/2}$                           | $\alpha^{1/2}$            | Nucleation                                                     |
| 8.                                                                       | $P_{1/3}$  | Mampel power law             | $3\alpha^{2/3}$                           | $\alpha^{1/3}$            | Nucleation                                                     |
| 9.                                                                       | $P_{1/4}$  | Mampel power law             | $4\alpha^{3/4}$                           | $\alpha^{1/4}$            | Nucleation                                                     |
| 10.                                                                      | E1         | Exponential law              | $\alpha$                                  | $\ln \alpha$              | Nucleation                                                     |
| III. Sigmoidal rate equations or random nucleation and subsequent growth |            |                              |                                           |                           |                                                                |
| 11.                                                                      | $A_1, F_1$ | Avrami–Erofeev eq.           | $(1-\alpha)$                              | $-\ln(1-\alpha)$          | Assumed random nucleation and its subsequent growth, $n = 1$   |
| 12.                                                                      | $A_{3/2}$  | Avrami–Erofeev eq.           | $(3/2) (1-\alpha)[- \ln(1-\alpha)]^{1/3}$ | $[- \ln(1-\alpha)]^{2/3}$ | Assumed random nucleation and its subsequent growth, $n = 1/2$ |
| 13.                                                                      | $A_2$      | Avrami–Erofeev eq.           | $2(1-\alpha)[- \ln(1-\alpha)]^{1/2}$      | $[- \ln(1-\alpha)]^{1/2}$ | Assumed random nucleation and its subsequent growth, $n = 2$   |
| 14.                                                                      | $A_3$      | Avrami–Erofeev eq.           | $3(1-\alpha) [- \ln(1-\alpha)]^{2/3}$     | $[- \ln(1-\alpha)]^{1/3}$ | Assumed random nucleation and its subsequent growth, $n = 3$   |
| 15.                                                                      | $A_4$      | Avrami–Erofeev eq.           | $4(1-\alpha) [- \ln(1-\alpha)]^{3/4}$     | $[- \ln(1-\alpha)]^{1/4}$ | Assumed random nucleation and its subsequent growth, $n = 4$   |
| 16.                                                                      | $A_u$      | Prout-Tomkins eq.            | $\ln[\alpha/(1-\alpha)]$                  | $\alpha(1-\alpha)$        | Branching nuclei                                               |

**Table S2** Algebraic expressions of kinetic functions  $f(\alpha)$  and  $g(\alpha)$  and its corresponding mechanism [2] (cont.).

| No.                                                          | Mechanism       | Name of the kinetic function                 | $f(\alpha)$                                       | $g(\alpha)$                                       | Rate-determining mechanism                           |
|--------------------------------------------------------------|-----------------|----------------------------------------------|---------------------------------------------------|---------------------------------------------------|------------------------------------------------------|
| IV. Deceleratory rate equations IV.I Phase boundary reaction |                 |                                              |                                                   |                                                   |                                                      |
| 17.                                                          | $R_1, F_0, P_1$ | Power law                                    | $(1-\alpha)^0$                                    | $\alpha$                                          | Contracting disk                                     |
| 18.                                                          | $R_2, F_{1/2}$  | Power law                                    | $2(1-\alpha)^{1/2}$                               | $1-(1-\alpha)^{1/2}$                              | Contracting cylinder<br>(cylindrical symmetry)       |
| 19.                                                          | $R_3, F_{2/3}$  | Power law                                    | $3(1-\alpha)^{2/3}$                               | $1-(1-\alpha)^{1/3}$                              | Contracting sphere<br>(spherical symmetry)           |
| IV.II Based on the diffusion mechanism                       |                 |                                              |                                                   |                                                   |                                                      |
| 20.                                                          | $D_1$           | Parabola law                                 | $1/2\alpha$                                       | $\alpha^2$                                        | One-dimensional diffusion                            |
| 21.                                                          | $D_2$           | Valensi eq.                                  | $[-\ln(1-\alpha)]^{-1}$                           | $\alpha+(1-\alpha)\ln(1-\alpha)$                  | Two-dimension diffusion                              |
| 22.                                                          | $D_3$           | Jander eq.                                   | $(3/2)(1-\alpha)^{2/3}[1-(1-\alpha)^{1/3}]^{-1}$  | $[1-(1-\alpha)^{1/3}]^2$                          | Three-dimensional diffusion,<br>spherical symmetry   |
| 23.                                                          | $D_4$           | Ginstling–<br>Brounstein eq.                 | $(3/2)[(1-\alpha)^{-1/3}-1]^{-1}$                 | $1-2\alpha/3-(1-\alpha)^{2/3}$                    | Three-dimensional diffusion,<br>cylindrical symmetry |
| 24.                                                          | $D_5$           | Zhuravlev, Lesokin,<br>Tempelman eq.         | $(3/2)(1-\alpha)^{4/3}[(1-\alpha)^{-1/3}-1]^{-1}$ | $[(1-\alpha)^{-1/3}-1]^2$                         | Three-dimensional diffusion                          |
| 25.                                                          | $D_6$           | anti-Jander eq.                              | $(3/2)(1+\alpha)^{2/3}[(1+\alpha)^{1/3}-1]^{-1}$  | $[(1+\alpha)^{1/3}-1]^2$                          | Three-dimensional diffusion                          |
| 26.                                                          | $D_7$           | anti-Ginstling–<br>Brounstein eq.            | $(3/2)(1+\alpha)^{-1/3}-1]^{-1}$                  | $1+2\alpha/3-(1+\alpha)^{2/3}$                    | Three-dimensional diffusion                          |
| 27.                                                          | $D_8$           | anti-Zhuravlev,<br>Lesokin,<br>Tempelman eq. | $(3/2)(1+\alpha)^{4/3}[(1+\alpha)^{-1/3}-1]^{-1}$ | $[(1+\alpha)^{-1/3}-1]^2$                         | Three-dimensional diffusion                          |
| V. Another kinetics equations with unjustified mechanism     |                 |                                              |                                                   |                                                   |                                                      |
| 28.                                                          | $G_1$           |                                              | $1-(1-\alpha)^2$                                  | $1/2(1-\alpha)$                                   |                                                      |
| 29.                                                          | $G_2$           |                                              | $1-(1-\alpha)^3$                                  | $1/3(1-\alpha)^2$                                 |                                                      |
| 30.                                                          | $G_3$           |                                              | $1-(1-\alpha)^4$                                  | $1/4(1-\alpha)^3$                                 |                                                      |
| 31.                                                          | $G_4$           |                                              | $[-\ln(1-\alpha)]^2$                              | $1/2(1-\alpha)[- \ln(1-\alpha)]^{-1}$             |                                                      |
| 32.                                                          | $G_5$           |                                              | $[-\ln(1-\alpha)]^3$                              | $1/3(1-\alpha)[- \ln(1-\alpha)]^{-2}$             |                                                      |
| 33.                                                          | $G_6$           |                                              | $[-\ln(1-\alpha)]^4$                              | $1/4(1-\alpha)[- \ln(1-\alpha)]^{-3}$             |                                                      |
| 34.                                                          | $G_7$           |                                              | $[1-(1-\alpha)^{1/2}]^{1/2}$                      | $4\{(1-\alpha)[1-(1-\alpha)^{1/2}]\}^{1/2}$       |                                                      |
| 35.                                                          | $G_8$           |                                              | $[1-(1-\alpha)^{1/3}]^{1/2}$                      | $6\{(1-\alpha)^{2/3}[1-(1-\alpha)^{1/3}]\}^{1/2}$ |                                                      |

### Power Law (P) Models:

When the nucleation rate follows the power law (Table S1) and nuclei growth is assumed to be constant ( $G(x) = k_G$ ). The Eq. (S11) can be written as

$$V(t) = \int_0^t \sigma(k_G(t - t_0))^\lambda (D\beta t_0^{\beta-1}) dt_0 \quad (S12)$$

Integrating Eq. (S12) gives

$$V(t) = \sigma k_G^\lambda D \beta t^{\beta+\lambda} \left(1 - \frac{\lambda\beta}{\beta+1} + \frac{\lambda(\lambda-1)}{2!} \cdot \frac{\beta}{\beta+2} \dots\right), \lambda \leq 3$$

where,  $n = \beta + \lambda$ . The equation change to be

$$V(t) = \sigma k_G^\lambda D' t^n \quad (S13)$$

where,  $D' = D\beta(1-\lambda\beta/(\beta+1))+\lambda(\lambda-1)/2! \cdot \beta/(\beta+2)$ .  $V(t)$  is directly proportional to the degree of conversion  $\alpha$

$$\alpha = V(t) \cdot C \quad (S14)$$

$C$  is a constant,  $C = 1/V_0$  and  $V_0$  is an initial volume. Substituting Eq. (S14) into (S13) leads to Eq. (S15) after the new rearrangement.

$$\begin{aligned} \alpha &= (kt)^n \\ \text{or} \quad kt &= \alpha^{1/n} \end{aligned} \quad (S15)$$

where  $k = (\sigma k_G^\lambda C D')^{1/n}$  as the rate constant. Eq. (S15) represent the power law (P) models as various  $n$ -orders. The P models is the acceleratory, which assume that nuclei growth is constant without restrictions.

### Avrami-Erofeyev (A) Models:

The nuclei growth restrictions always occur in solid state decomposition. There are two restriction types found on nuclei growth such as (i) coalescence: loss of reaction interface by overlapping of nuclei and (ii) ingestion: elimination of nucleation site, ingestion site does not produce the product called “phantom nuclei”. At time  $t$ , the total number of possible nuclei forming sites ( $N_0$ ) can be expressed by

$$N_0 = N(t) + N_1(t) + N_2(t)$$

where,  $N(t)$  is the number of nuclei activated,  $N_1(t)$  is the actual number of nuclei, and  $N_2(t)$  is the number of nuclei ingested. Therefore, the actual number of nuclei equal to

$$N_1(t) = N_0 - N(t) - N_2(t) \quad (\text{S16})$$

Based on Eq. (S12), substituting the nucleation rate by exponential law gives

$$V(t) = \int_0^t \sigma(k_G(t - t_0))^\lambda (k_N N_0 e^{-k_N t}) dt \quad (\text{S17})$$

Eq. (S17) is impossible to solve. Avrami [1] has proposed the extended conversion fraction  $\alpha_E$ , which include the effect of restrictions (the overlapping of nucleation and ingestion of the nucleation) as following the equation

$$d\alpha_E = \frac{1}{(1-\alpha)} d\alpha \quad (\text{S18})$$

integrating Eq. (S18) yields

$$\alpha_E = \int_0^\infty \frac{1}{(1-\alpha)} d\alpha = -\ln(1 - \alpha) \quad (\text{S19})$$

According to Eq. (S15), which neglect the restricted nucleation, instead  $\alpha$  by  $\alpha_E$ , the equation change to be

$$\begin{aligned} (kt)^n &= -\ln(1 - \alpha) \\ kt &= [-\ln(1 - \alpha)]^{1/n} \end{aligned} \quad (\text{S20})$$



Eq. (2.36) agree with the research reported by Johnson, Mehl, Avrami, Erofeyev, and Kholmogorov [Error! Bookmark not defined.], therefore the A models with different  $n$ -order may be called the JMAEK models.

## 2.) Geometrical Contraction (R) Models

Based on assumption that the nucleation occur rapidly on the surface and the rate of decomposition is controlled by the reaction progresses toward from into center of crystal. The radius at time  $t$  ( $r$ ) can be derive as

$$r = r_0 - kt \quad (S21)$$

where,  $r_0$  is the radius of at time  $t_0$  and  $k$  is the rate constant. The mathematical models are different depending on crystalline shape.

### The contracting cylinder (contracting area) or $R_2$ model:

The volume of cylindrical structure equal to  $h\pi r^2$ , where  $h$  is the cylindrical height and  $r^2$  is the cylindrical radius. The volume of  $n$  molecules is  $nh\pi r^2$ . From the description of the conversion fraction  $\alpha$  ( $\alpha = \frac{m_i - m_t}{m_i - m_f}$ ), which assume that  $m_f = 0$ , hence

$$\alpha = \frac{m_0 - m_t}{m_0} \quad (S22)$$

when, weight = volume  $\times$  density ( $\rho$ ), therefore  $\alpha$  can be expressed as follow.

$$\begin{aligned} \alpha &= \frac{n\rho h\pi r_0^2 - n\rho h\pi r^2}{n\rho h\pi r_0^2} \\ \alpha &= \left(1 - \frac{r^2}{r_0^2}\right) \end{aligned} \quad (S23)$$

substituting Eq. (S221) into Eq. (S22) followed by the arrangement yields

$$\alpha = 1 - \left(\frac{r_0 - kt}{r_0}\right)^2$$

$$1 - \alpha = \left(1 - \frac{k}{r_0} t\right)^2 \quad (\text{S24})$$

If  $k/r_0 = k_0$ , Eq. (S24) will be changed to Eq. (S25), which represents the contracting cylinder (contracting area) or  $R_2$  models as followed

$$1 - (1 - \alpha)^{1/2} = k_0 t \quad (\text{S25})$$

### **The contracting sphere/cube (contracting volume) $R_3$ or model:**

For  $n$  number of spherical or cubical shape of crystalline solid, the volume equal to  $n4\pi r^3/3$  and the weight can be written as

$$\text{weight} = \frac{4}{3} n \rho \pi r^3 \quad (\text{S26})$$

The conversion fraction in Eq. (2.38) can be expressed as

$$\alpha = \frac{\frac{4}{3} n \rho \pi r_0^3 - \frac{4}{3} n \rho \pi r^3}{\frac{4}{3} n \rho \pi r_0^3}$$

$$\alpha = \left(1 - \frac{r^3}{r_0^3}\right) \quad (\text{S27})$$

Substitution of  $r$  from Eq. (S21), the Eq. (S27) will be in the form of Eq. (S28)

$$\alpha = 1 - \left(\frac{r_0 - kt}{r_0}\right)^3$$

$$1 - \alpha = \left(1 - \frac{k}{r_0} t\right)^3 \quad (\text{S28})$$

If  $k/r_0 = k_0$ , the Eq. (S28) will be changed to the contracting sphere/cube (contracting volume) or  $R_3$  model as shown in Eq. (S29).

$$1 - (1 - \alpha)^{1/3} = k_0 t \quad (\text{S29})$$

### **3.) Diffusion (D) Models**

Homogeneous solid-state reaction, which occurs between crystal lattices or with molecules that permeate into lattices, where motion is restricted and is dependent on lattices defect. The reaction rate is controlled by the lattice movement from the reaction interface. Therefore, the rate of diffusion-controlled reactions decreases proportionally with the thickness of the product barrier.

In one-dimensional diffusion through a flat plane as showed in Figure S1. When A and B are reactants, AB is the product,  $l$  is the thickness of the interface, and  $x$  is the distance from product AB to interface Q.

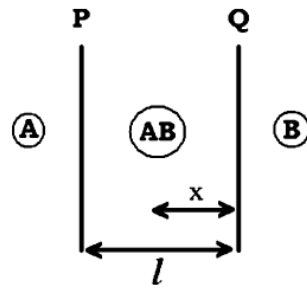

**Figure S1** One-dimensional diffusion through a flat plane [1]

According to Figure S1, the mass of B moving across P (unit area) in time  $dt$  to form product AB is

$$\frac{dl}{dt} = -D \frac{M_{AB}}{M_B \rho} \frac{dC}{dx} \quad (S30)$$

where,  $M_{AB}$  and  $M_B$  are the molecular weight of product AB and reactant B, respectively,  $D$  is the diffusion coefficient,  $\rho$  is the density of product, and  $C$  is the concentration. Based on assumption that the concentration of B has a linear relationship with that of AB.  $dC/dx|_{x=l} = -(C_2 - C_1)/l$ , where  $C_2$  and  $C_1$  are the concentration of B at interfaces P and Q, respectively, Eq. (S30) can be written as

$$\frac{dl}{dt} = D \frac{M_{AB}}{M_B \rho} \frac{(C_2 - C_1)}{l} \quad (S31)$$

Integrating Eq. (S31) gives

$$l^2 = 2D \frac{M_{AB}(C_2 - C_1)}{M_B \rho} t \quad (\text{S32})$$

when,  $k = 2D[M_{AB}(C_2 - C_1)]/M_B \rho$ , the equation can be reduced to be

$$l^2 = kt \quad (\text{S33})$$

Eq. (2.49) is the parabolic law, which is the simplest rate equation and suitable for an infinity flat plane without the consideration of a shape factor. The conversion fraction  $\alpha$  is directly proportional to the product layer  $l$ , therefore, Eq. (S33) leads to the one-dimensional diffusion (D<sub>1</sub>) model as followed

$$\alpha^2 = k't \quad (\text{S34})$$

Based on the assumption that the spherical particles (Figure S2) can follow the mathematical equation representing the three-dimensional diffusion (D<sub>3</sub>) model.

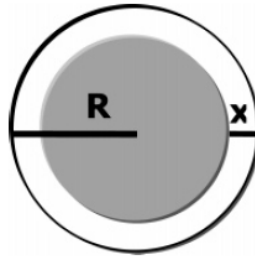

**Figure S2** Schematic representation of a spherical reaction [1]

According to Eq. (S22) and the definition of the spherical volume, the conversion fraction is derived to be

$$\alpha = \frac{\frac{4}{3}n\rho\pi R^3 - \frac{4}{3}n\rho\pi(R-x)^3}{\frac{4}{3}n\rho\pi R^3}$$

$$\alpha = 1 - \left(\frac{R-x}{R}\right)^3$$

After the mathematical arrangement, Eq. (S35) is obtained.

$$x = R(1 - (1 - \alpha)^{1/3}) \quad (\text{S35})$$

From Eq. (S35), Jander [1] used the parabolic law (Eq. (S34)) to define  $x$  and substituted into Eq. (S35). The equation can be written as

$$R^2(1 - (1 - \alpha)^{1/3})^2 = kt \quad (\text{S36})$$

when  $k' = k/R^2$ , Eq. (S36) becomes the D<sub>3</sub> (Jander) model and the equation is expressed as

$$(1 - (1 - \alpha)^{1/3})^2 = k't \quad (\text{S37})$$

The Jander model (Eq. (S37)) is oversimplified and can be used at low  $x/R$  values. However, there are many assumptions used to derive various diffusion controlled models.

#### 4.) Reaction order (F) Models

In homogenous kinetics, the reaction order (F) models are the simplest models controlling the mechanism. Under the assumption that the rate is proportional to concentration, conversion fraction of reactants raise to a power, which is the reaction order. The general equation of the reaction order model is

$$\frac{d\alpha}{dt} = k(1 - \alpha)^n \quad (\text{S38})$$

where,  $n$  is the reaction order. At  $n = 0$ , Eq. (S38) becomes the zero-order (F0/R1) model as the differential form

$$\frac{d\alpha}{dt} = k \quad (\text{S39})$$

which corresponds to the following integral form

$$\alpha = kt \quad (\text{S40})$$

If  $n = 1$ , the first-order ( $F_1$ ) model can be obtained as in Eq. (S41), which is in the differential form.

$$\frac{d\alpha}{dt} = k(1 - \alpha) \quad (\text{S41})$$

The integral form is shown in Eq. (2.58)

$$-\ln(1 - \alpha) = kt \quad (\text{S42})$$

This  $F_1$  model shown in Eq. (S42) may be called the Mampel model as a particular case of the A models when  $n = 1$ .

#### References

1. Khanwan, A. & Flanagan, D.R. (2006). Solid-state kinetic models: Basics and mathematical fundamentals. **J. Phys. Chem.**, **110**, 17315–17328.
2. Vyazovkin, S., Burnham, A.K., Criado, J.M., Pérez-Maqueda, L.A., Popescu, C., & Sbirrazuoli, N. (2011). ICTAC kinetics committee recommendations for performing kinetic computations on thermal analysis data. **Thermochim. Acta**, **520**, 1–19.
